# Supplementary material for: Towards Understanding the Key Signature Pathways Associated from Differentially Expressed Gene Analysis in an Indian Prostate Cancer Cohort
Source: Preprints.org preprint supplement (doi:10.20944/preprints202301.0123.v1), 2023-01-06
Supplement: Supplementary file 1 [file supplementary]

We performed Real-time PCR for some of the genes. Due to poor quality of isolated RNA from the FFPE blocks, we could not see much difference for a few genes. But for some genes, we saw significant change between control and malignant samples which could be further validated at the protein level.


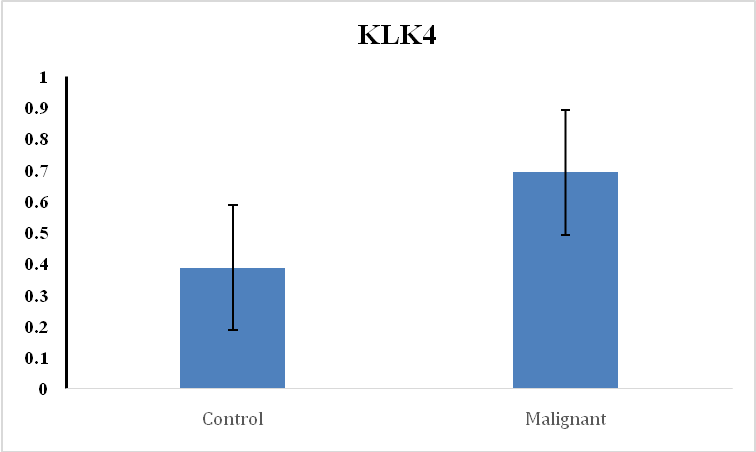


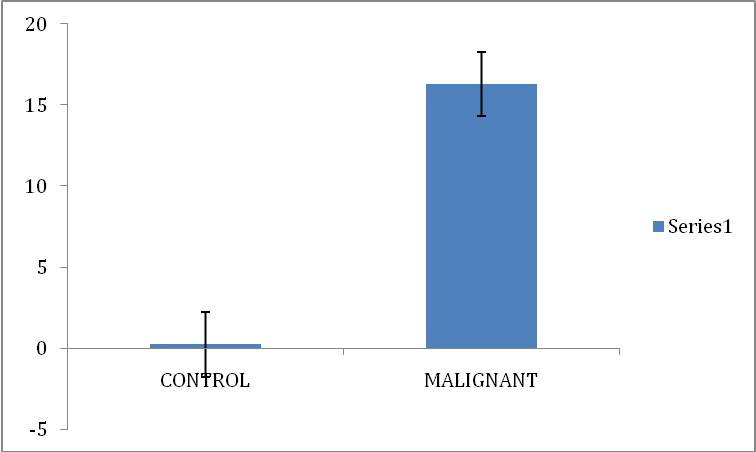


ADA

ADA

ADA

ADA

ADA

ADA

ADA

ADA

ADA

ADA

ADA

ADA

ADA

ADA

ADA

ADA


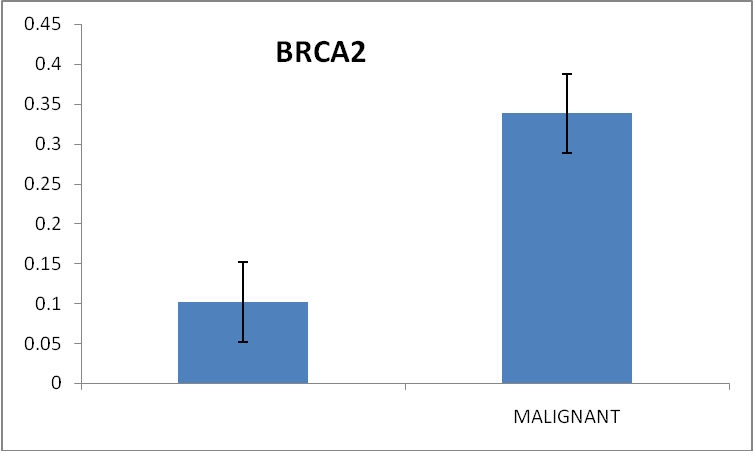


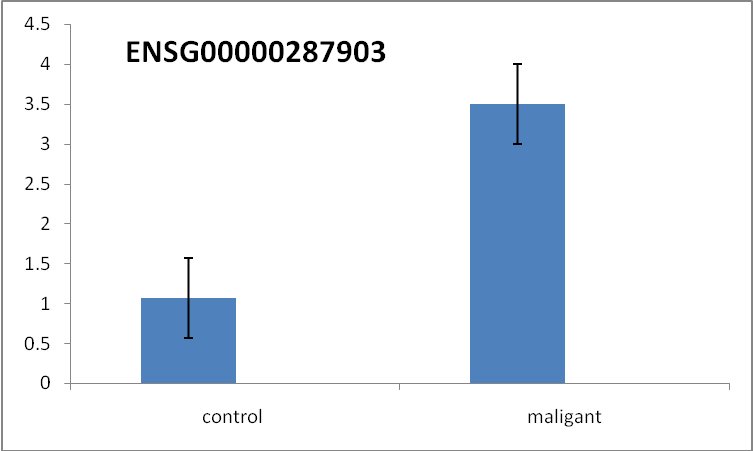


Primers used in the current study

1. KLK4

KLK4. F  5′-CTTGCTCGCTAACGACCTCAT-3′

KLK4. R  5′-GCCAGAAACGAGGCAAGAGT-3′

2. ADA

ADA.F- TGCCTCCGGGAGCTGCTTGC

ADA.R- CCACAAGGAGACCACCTTGA

3. BRCA2

BRCA2.F- TCTCCCTCTAGTGGCTTCCA

BRCA2.R- AGCTGCAAGCTCATCCTTGT

4. ENSG00000287903

Forward: AACAGAGAGGGAGCTTGTGC

Reverse: GAAGGGCCTGTGGGAGTTAT

5. GAPDH

GAPDH.F – CCATCACCATCTTCCAGGAGCGA

GAPDH.R- GGTGGTGAAGACGCCAGTGGA

**Methodology:**

cDNA synthesis was carried out using QuantiTect Rev. Transcription Kit (Qiagen, Cat No-205311) according to manufacturer’s protocol. The real time qRT-PCR was performed in the LightCycler 480 II (Roche) using Applied Biosystems™ Power SYBR™ Green PCR Master Mix (ThermoFisher Scientific, Cat No-4367659) in a total volume of 10µl. Each reaction was performed in triplicates. The cycling protocol consisted of denaturation step at 95ºC for 30 s, annealing at 60ºC for 30 s and extension at 72ºC for 1min and repeated for 45 times.
