# Supplementary material for: Towards Understanding the Key Signature Pathways Associated from Differentially Expressed Gene Analysis in an Indian Prostate Cancer Cohort
Source: Preprints.org preprint supplement (doi:10.20944/preprints202301.0123.v1), 2023-01-06
Supplement: Supplementary file 3 [file supplementary_Tables.xls]

## Sheet: Supp_Table_1a_GO_Molecular_function
Analysis Type:	PANTHER Overrepresentation Test (Released 20220712)
Annotation Version and Release Date:	GO Ontology database DOI: 10.5281/zenodo.6799722 Released 2022-07-01
Analyzed List:	upload_1 (Homo sapiens)
Reference List:	Homo sapiens (all genes in database)
Test Type:	FISHER
Correction:	NONE
GO molecular function complete	Homo sapiens - REFLIST (20589)	upload_1 (50)	upload_1 (expected)	upload_1 (over/under)	upload_1 (fold Enrichment)	upload_1 (raw P-value)
amylin binding (GO:0097645)	1	1	0	+	> 100	0.00484
clathrin-uncoating ATPase activity (GO:1990833)	1	1	0	+	> 100	0.00484
dol-P-Man:Man(5)GlcNAc(2)-PP-Dol alpha-1,3-mannosyltransferase activity (GO:0052925)	1	1	0	+	> 100	0.00484
interleukin-27 receptor activity (GO:0045509)	2	1	0	+	> 100	0.00725
interleukin-6 binding (GO:0019981)	2	1	0	+	> 100	0.00725
mu-type opioid receptor binding (GO:0031852)	2	1	0	+	> 100	0.00725
interleukin-6 receptor activity (GO:0004915)	2	1	0	+	> 100	0.00725
ferric-chelate reductase activity (GO:0000293)	3	1	0.01	+	> 100	0.00966
1-phosphatidylinositol-3-phosphate 5-kinase activity (GO:0000285)	3	1	0.01	+	> 100	0.00966
cupric reductase activity (GO:0008823)	3	1	0.01	+	> 100	0.00966
alpha-1,3-mannosyltransferase activity (GO:0000033)	3	1	0.01	+	> 100	0.00966
RNA uridylyltransferase activity (GO:0050265)	3	1	0.01	+	> 100	0.00966
interleukin-11 binding (GO:0019970)	3	1	0.01	+	> 100	0.00966
corticotropin-releasing hormone receptor 1 binding (GO:0051430)	3	1	0.01	+	> 100	0.00966
PTB domain binding (GO:0051425)	3	1	0.01	+	> 100	0.00966
interleukin-11 receptor activity (GO:0004921)	3	1	0.01	+	> 100	0.00966
ferric-chelate reductase (NADPH) activity (GO:0052851)	3	1	0.01	+	> 100	0.00966
1-phosphatidylinositol-5-kinase activity (GO:0052810)	3	1	0.01	+	> 100	0.00966
acetylcholine receptor activator activity (GO:0030549)	4	1	0.01	+	> 100	0.0121
adenylate cyclase activator activity (GO:0010856)	4	1	0.01	+	> 100	0.0121
ATP-dependent protein disaggregase activity (GO:0140545)	5	1	0.01	+	82.36	0.0144
calcitonin family binding (GO:0097644)	5	1	0.01	+	82.36	0.0144
calmodulin-dependent protein phosphatase activity (GO:0033192)	5	1	0.01	+	82.36	0.0144
corticotropin-releasing hormone receptor binding (GO:0051429)	5	1	0.01	+	82.36	0.0144
oxidoreductase activity, acting on metal ions, NAD or NADP as acceptor (GO:0016723)	5	1	0.01	+	82.36	0.0144
C3HC4-type RING finger domain binding (GO:0055131)	6	1	0.01	+	68.63	0.0168
1-phosphatidylinositol 4-kinase activity (GO:0004430)	6	1	0.01	+	68.63	0.0168
protein-cysteine S-myristoyltransferase activity (GO:0019705)	6	1	0.01	+	68.63	0.0168
heparan sulfate binding (GO:1904399)	6	1	0.01	+	68.63	0.0168
oncostatin-M receptor activity (GO:0004924)	6	1	0.01	+	68.63	0.0168
leukemia inhibitory factor receptor activity (GO:0004923)	6	1	0.01	+	68.63	0.0168
beta-2 adrenergic receptor binding (GO:0031698)	6	1	0.01	+	68.63	0.0168
protein-cysteine S-stearoyltransferase activity (GO:0140439)	7	1	0.02	+	58.83	0.0192
uridylyltransferase activity (GO:0070569)	7	1	0.02	+	58.83	0.0192
opioid receptor binding (GO:0031628)	7	1	0.02	+	58.83	0.0192
fructose transmembrane transporter activity (GO:0005353)	7	1	0.02	+	58.83	0.0192
calcium-dependent protein serine/threonine phosphatase activity (GO:0004723)	7	1	0.02	+	58.83	0.0192
interleukin-6 receptor binding (GO:0005138)	7	1	0.02	+	58.83	0.0192
dehydroascorbic acid transmembrane transporter activity (GO:0033300)	8	1	0.02	+	51.47	0.0216
interleukin-17 receptor activity (GO:0030368)	8	1	0.02	+	51.47	0.0216
D1 dopamine receptor binding (GO:0031748)	8	1	0.02	+	51.47	0.0216
ciliary neurotrophic factor receptor activity (GO:0004897)	8	1	0.02	+	51.47	0.0216
ciliary neurotrophic factor receptor binding (GO:0005127)	9	1	0.02	+	45.75	0.024
1-phosphatidylinositol-4-phosphate 5-kinase activity (GO:0016308)	9	1	0.02	+	45.75	0.024
phosphatidylinositol-3,4-bisphosphate 5-kinase activity (GO:0052812)	9	1	0.02	+	45.75	0.024
phosphatidylinositol kinase activity (GO:0052742)	19	2	0.05	+	43.35	0.00117
phosphatidylinositol bisphosphate kinase activity (GO:0052813)	10	1	0.02	+	41.18	0.0263
delta-catenin binding (GO:0070097)	11	1	0.03	+	37.43	0.0287
myristoyltransferase activity (GO:0019107)	11	1	0.03	+	37.43	0.0287
alpha-catenin binding (GO:0045294)	11	1	0.03	+	37.43	0.0287
RAGE receptor binding (GO:0050786)	11	1	0.03	+	37.43	0.0287
platelet-derived growth factor binding (GO:0048407)	11	1	0.03	+	37.43	0.0287
D-glucose transmembrane transporter activity (GO:0055056)	12	1	0.03	+	34.31	0.031
protein-containing complex destabilizing activity (GO:0140776)	12	1	0.03	+	34.31	0.031
glucose binding (GO:0005536)	13	1	0.03	+	31.68	0.0334
acetylcholine receptor binding (GO:0033130)	14	1	0.03	+	29.41	0.0357
cyclase regulator activity (GO:0010851)	15	1	0.04	+	27.45	0.0381
translation activator activity (GO:0008494)	15	1	0.04	+	27.45	0.0381
BMP receptor binding (GO:0070700)	15	1	0.04	+	27.45	0.0381
1-phosphatidylinositol binding (GO:0005545)	15	1	0.04	+	27.45	0.0381
Arp2/3 complex binding (GO:0071933)	15	1	0.04	+	27.45	0.0381
phosphatidylinositol phosphate kinase activity (GO:0016307)	16	1	0.04	+	25.74	0.0404
tropomyosin binding (GO:0005523)	16	1	0.04	+	25.74	0.0404
protein phosphatase activator activity (GO:0072542)	16	1	0.04	+	25.74	0.0404
dopamine receptor binding (GO:0050780)	16	1	0.04	+	25.74	0.0404
oxidoreductase activity, acting on metal ions (GO:0016722)	16	1	0.04	+	25.74	0.0404
insulin-like growth factor receptor binding (GO:0005159)	16	1	0.04	+	25.74	0.0404
acetylcholine receptor regulator activity (GO:0030548)	17	1	0.04	+	24.22	0.0427
neurotransmitter receptor regulator activity (GO:0099602)	17	1	0.04	+	24.22	0.0427
clathrin adaptor activity (GO:0035615)	18	1	0.04	+	22.88	0.0451
minus-end-directed microtubule motor activity (GO:0008569)	18	1	0.04	+	22.88	0.0451
cadherin binding involved in cell-cell adhesion (GO:0098641)	18	1	0.04	+	22.88	0.0451
heparan sulfate proteoglycan binding (GO:0043395)	19	1	0.05	+	21.67	0.0474
cargo adaptor activity (GO:0140312)	19	1	0.05	+	21.67	0.0474
peptide hormone receptor binding (GO:0051428)	19	1	0.05	+	21.67	0.0474
adrenergic receptor binding (GO:0031690)	19	1	0.05	+	21.67	0.0474
apolipoprotein binding (GO:0034185)	19	1	0.05	+	21.67	0.0474
cyclosporin A binding (GO:0016018)	20	1	0.05	+	20.59	0.0497
scaffold protein binding (GO:0097110)	66	2	0.16	+	12.48	0.0118
beta-catenin binding (GO:0008013)	90	2	0.22	+	9.15	0.021
chaperone binding (GO:0051087)	107	2	0.26	+	7.7	0.0287
protein tyrosine kinase binding (GO:1990782)	122	2	0.3	+	6.75	0.0364
unfolded protein binding (GO:0051082)	124	2	0.3	+	6.64	0.0374
cadherin binding (GO:0045296)	325	5	0.79	+	6.34	0.00119
growth factor binding (GO:0019838)	134	2	0.33	+	6.15	0.043
growth factor receptor binding (GO:0070851)	141	2	0.34	+	5.84	0.047
cell adhesion molecule binding (GO:0050839)	552	6	1.34	+	4.48	0.0022
G protein-coupled receptor binding (GO:0001664)	294	3	0.71	+	4.2	0.0352
ubiquitin protein ligase binding (GO:0031625)	301	3	0.73	+	4.1	0.0373
ubiquitin-like protein ligase binding (GO:0044389)	320	3	0.78	+	3.86	0.0434
kinase binding (GO:0019900)	792	5	1.92	+	2.6	0.043
RNA binding (GO:0003723)	1666	9	4.05	+	2.22	0.018
protein-containing complex binding (GO:0044877)	1312	7	3.19	+	2.2	0.0386
enzyme binding (GO:0019899)	2103	11	5.11	+	2.15	0.0155
protein binding (GO:0005515)	14448	42	35.09	+	1.2	0.0307
binding (GO:0005488)	16594	47	40.3	+	1.17	0.0118

## Sheet: Supp_Table_1b_GO biological process
Analysis Type:	PANTHER Overrepresentation Test (Released 20220712)
Annotation Version and Release Date:	GO Ontology database DOI: 10.5281/zenodo.6799722 Released 2022-07-01
Analyzed List:	upload_1 (Homo sapiens)
Reference List:	Homo sapiens (all genes in database)
Test Type:	FISHER
Correction:	FDR
GO biological process complete	Homo sapiens - REFLIST (20589)	upload_1 (50)	upload_1 (expected)	upload_1 (over/under)	upload_1 (fold Enrichment)	upload_1 (raw P-value)	upload_1 (FDR)
intracellular protein transport (GO:0006886)	682	10	1.66	+	6.04	5.14e-06	0.0269
cell adhesion (GO:0007155)	969	12	2.35	+	5.1	2.83e-06	0.0444
protein transport (GO:0015031)	1179	13	2.86	+	4.54	3.56e-06	0.0279
establishment of protein localization (GO:0045184)	1267	13	3.08	+	4.23	7.75e-06	0.0304
establishment of localization in cell (GO:0051649)	1752	15	4.25	+	3.53	1.16e-05	0.0362

## Sheet: Supplementary_Table_2
Lnc-Pro results:
lncRNA	Interaction with Other Proteins	Percentage (>90%)
FLJ16779	BRCA1	0.93
	OTOF	0.974
	MRE11	0.956
	OPA1	0.97
LINC00940	BRCA1	0.96
NONHSAT025436	COL6A1	0.964
	MRE11	0.958
